# Supplementary material for: Biomechanics meets the ecological niche: the importance of temporal data resolution
Source: Oxford University Press journal article supplement (doi:10.1242/jeb.059634), 2012-02-22

1973-1978 Monthly

Daily

### Thermoconformer (0% shade)

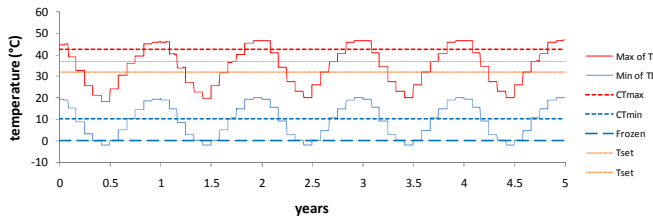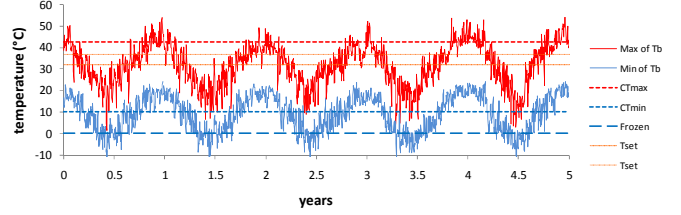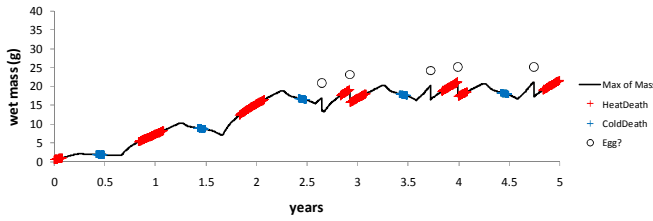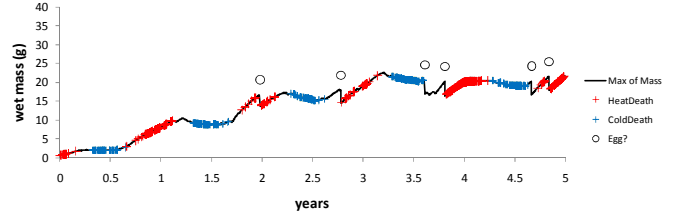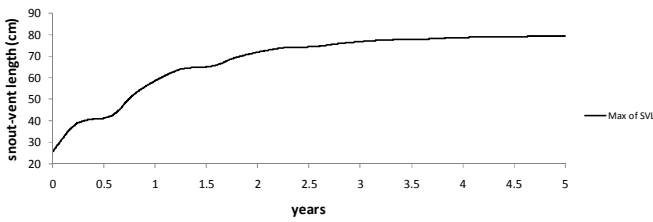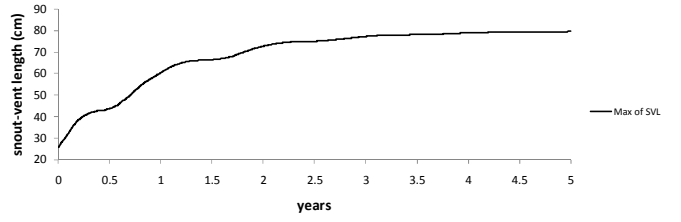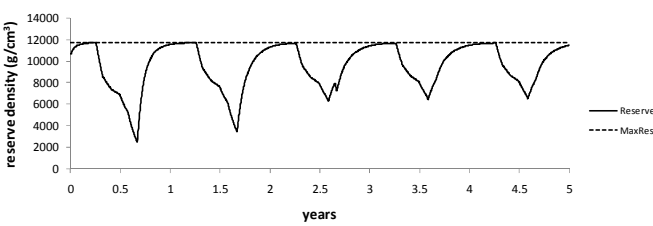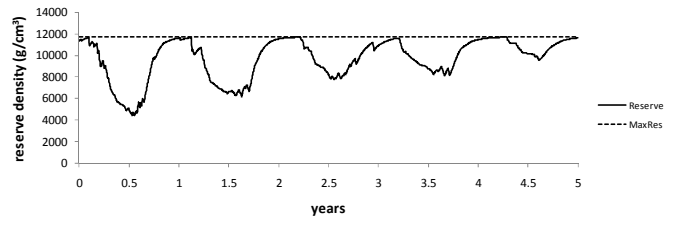

### Thermoregulator (low quality habitat)

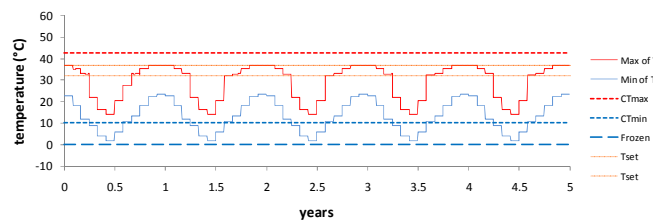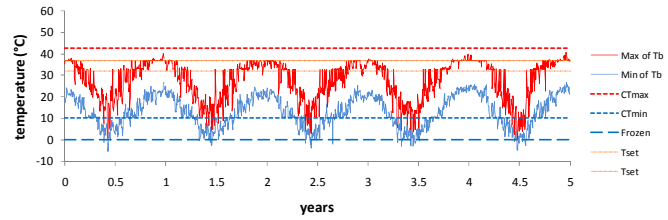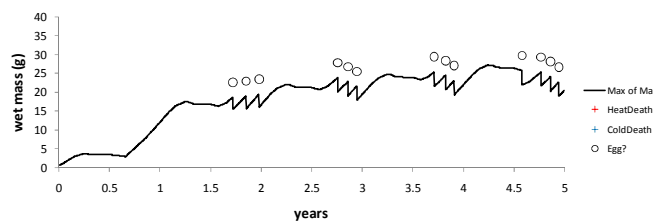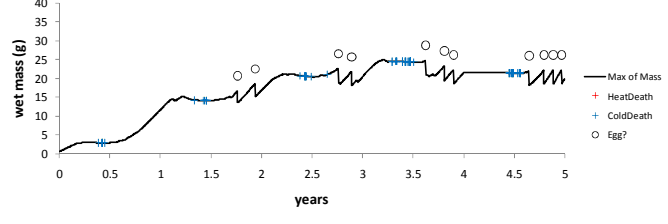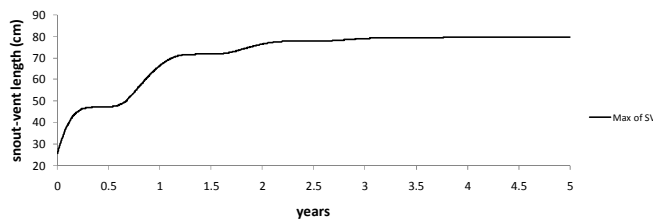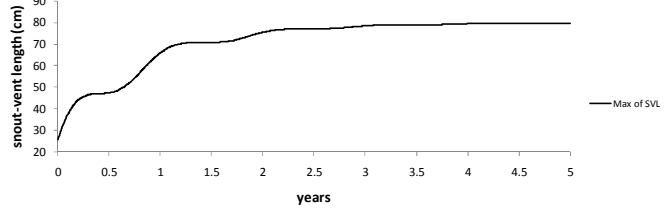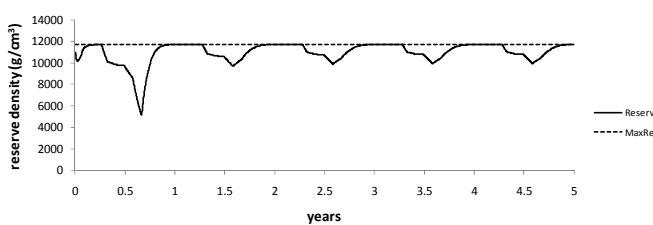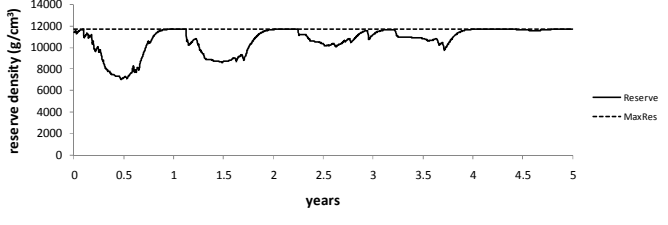

1973-1978 Monthly

Daily

# Thermoregulator (high quality habitat)

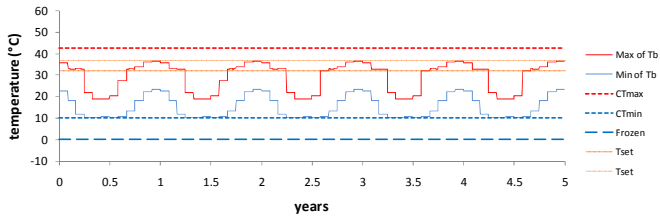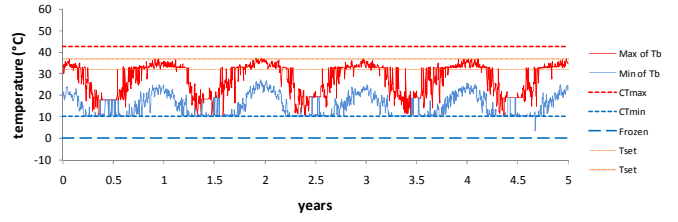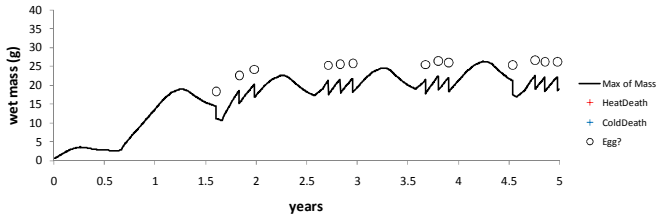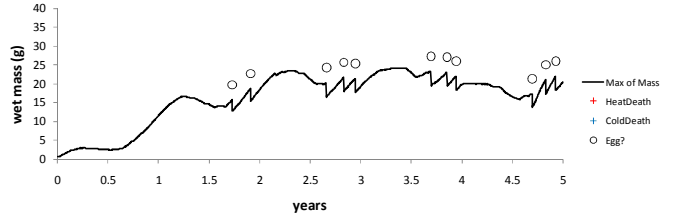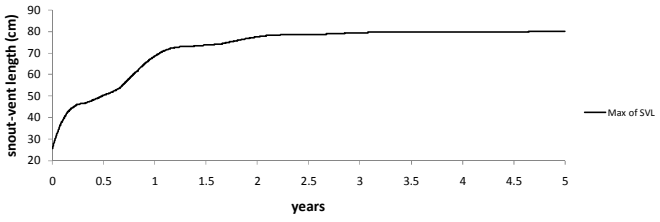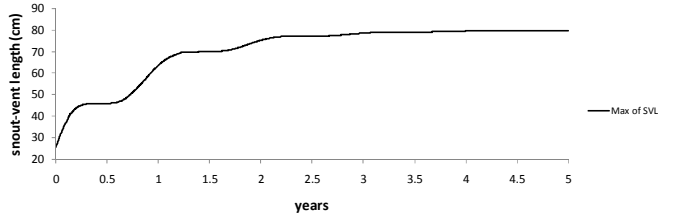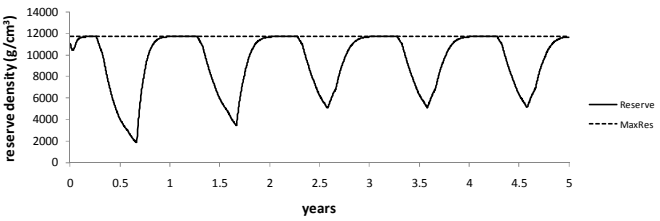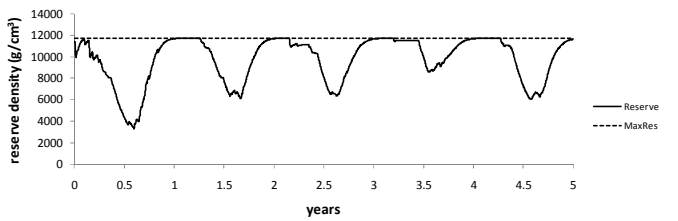

1978-1983 Monthly

Daily

### Thermoconformer (0% shade)

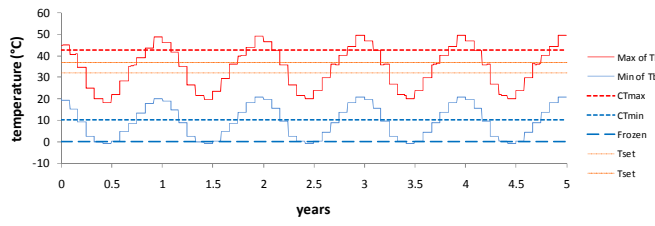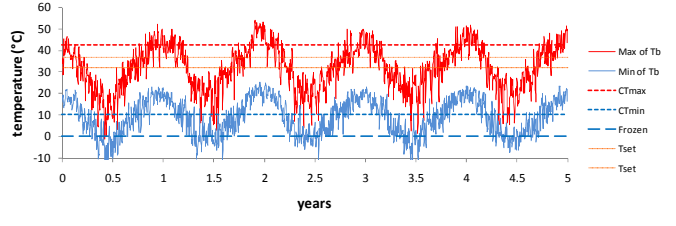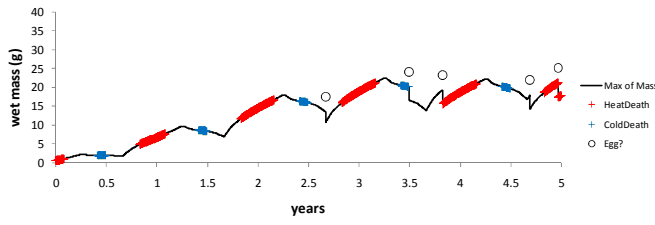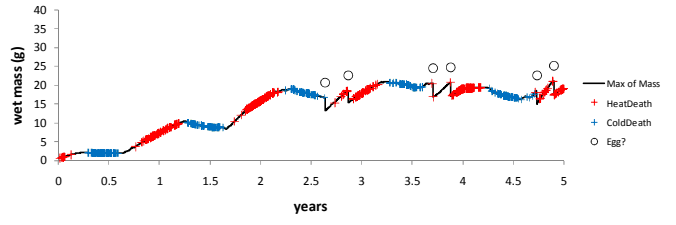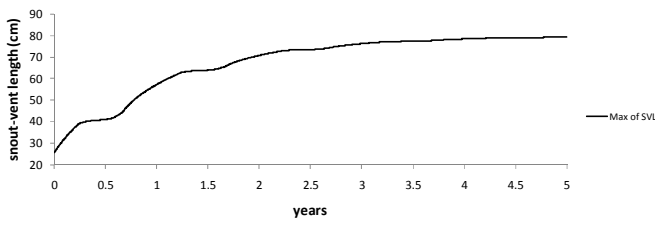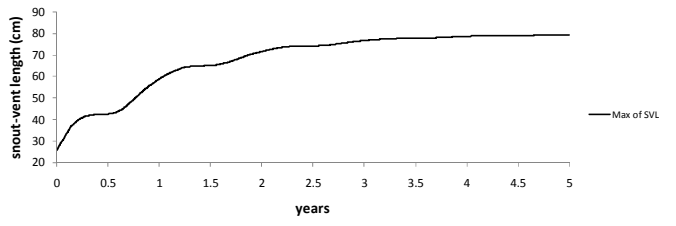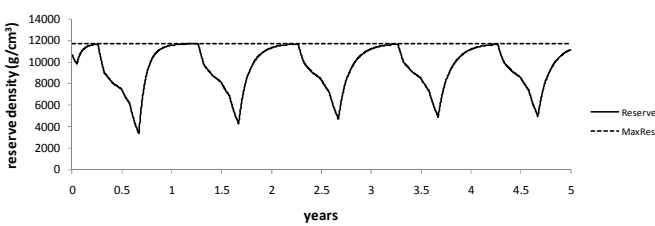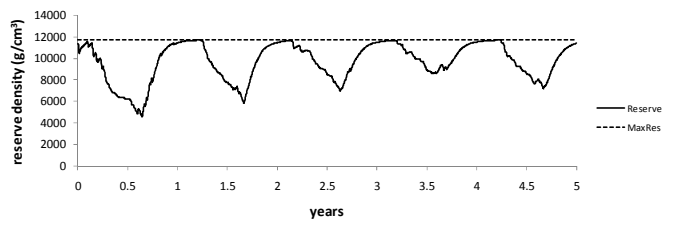

### Thermoregulator (low quality habitat)

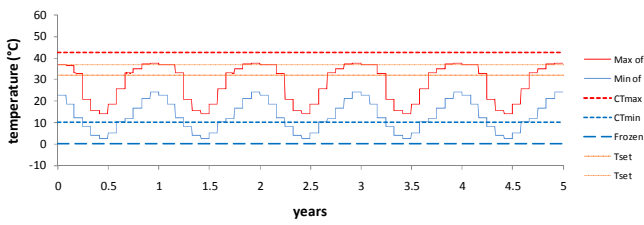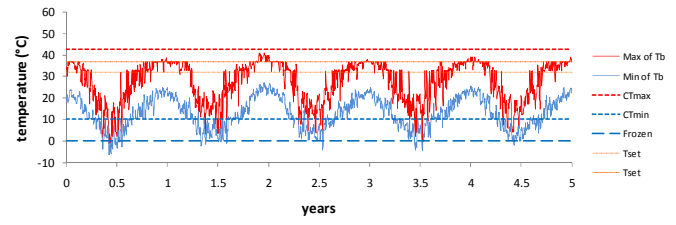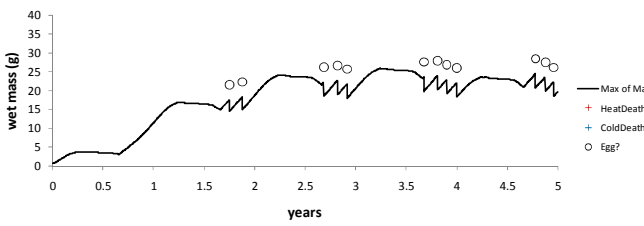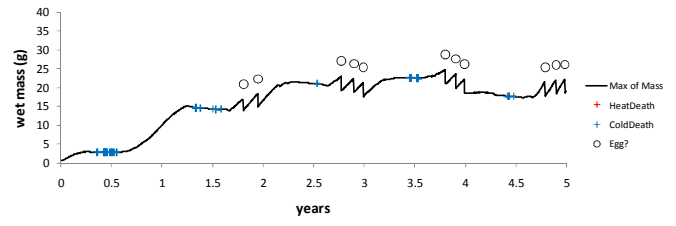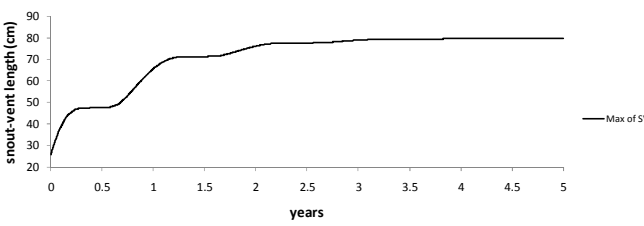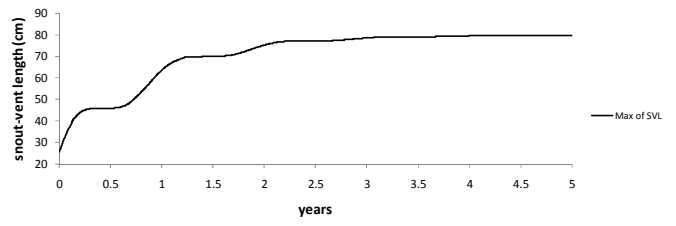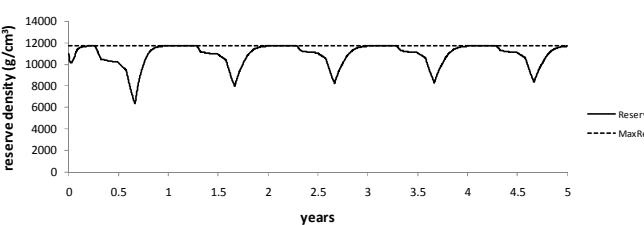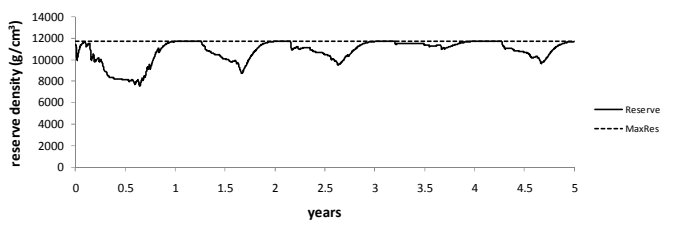

1978-1983 Monthly

Daily

# Thermoregulator (high quality habitat)

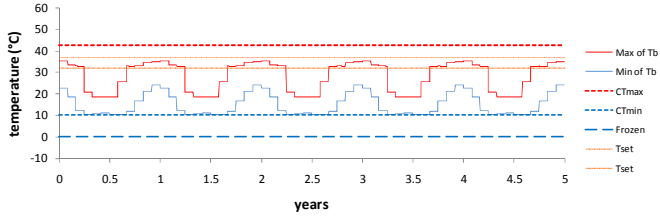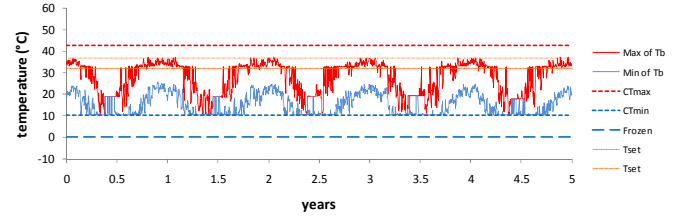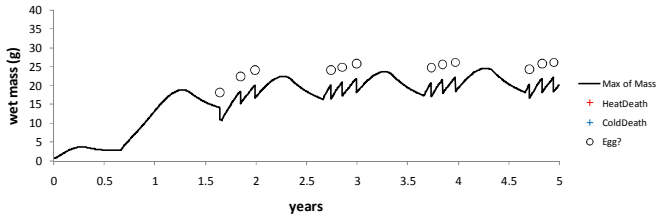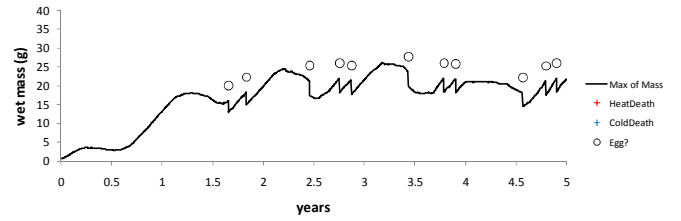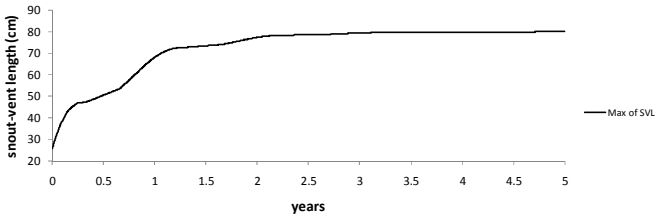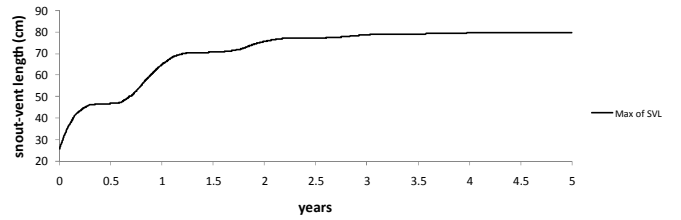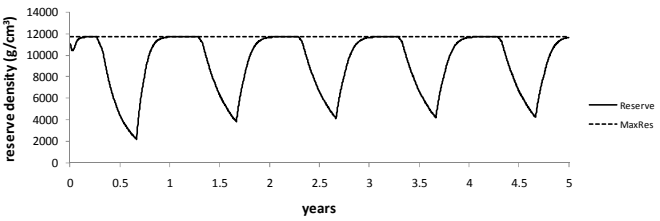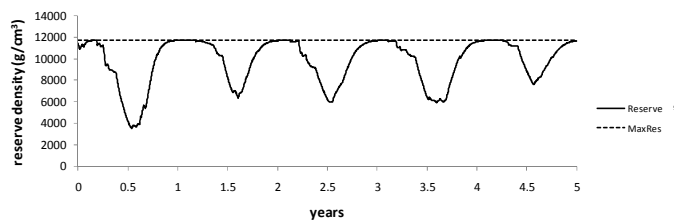

1983-1988 Monthly

Daily

### Thermoconformer (0% shade)

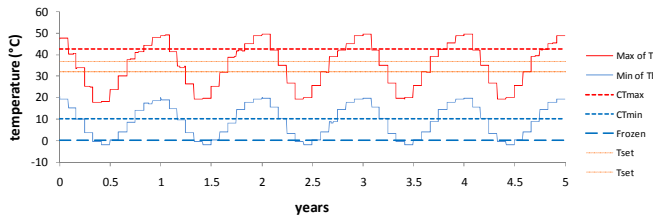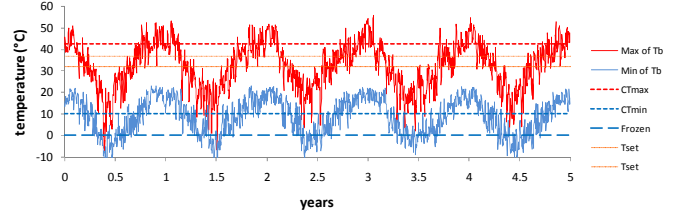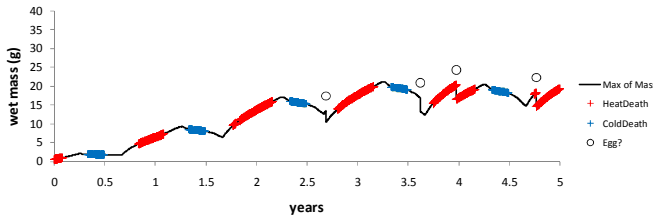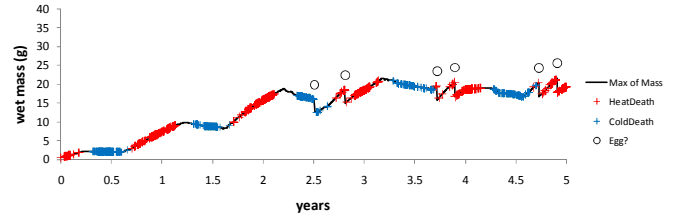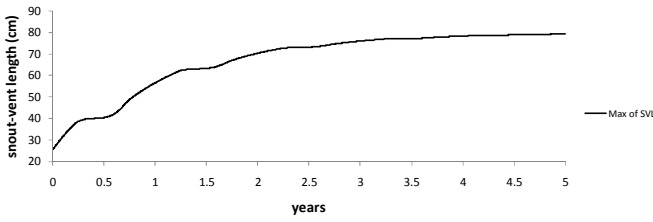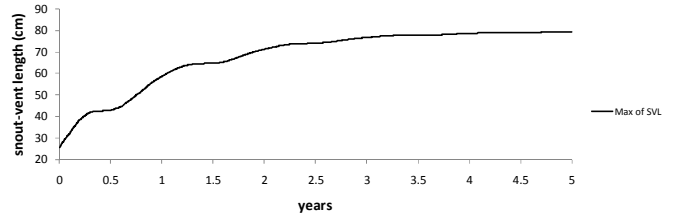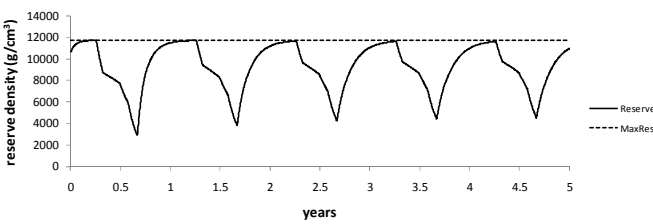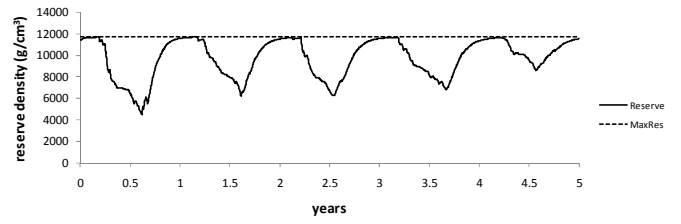

### Thermoregulator (low quality habitat)

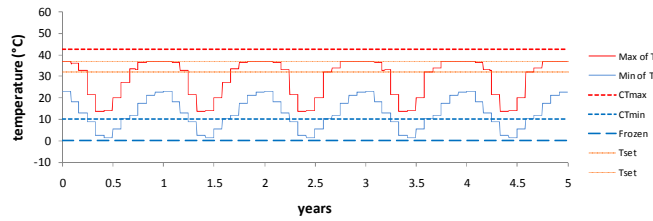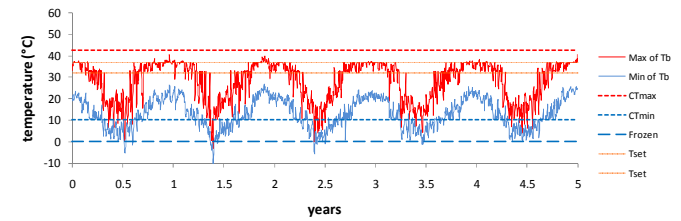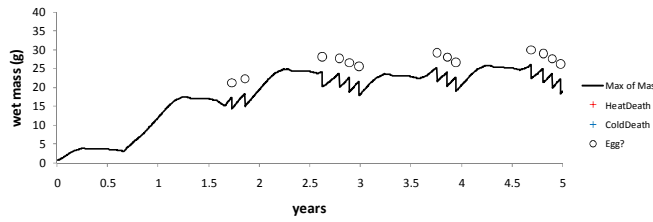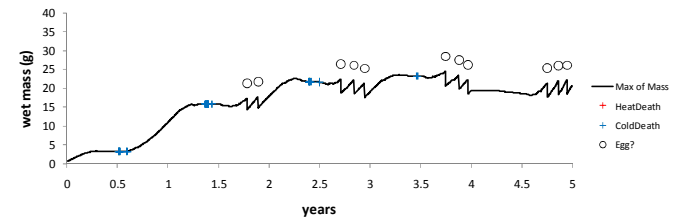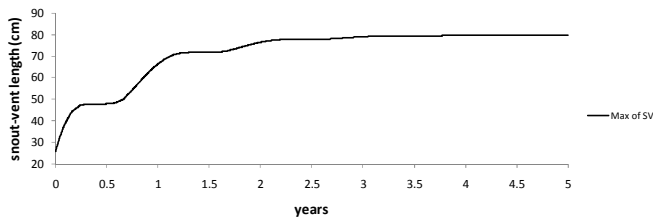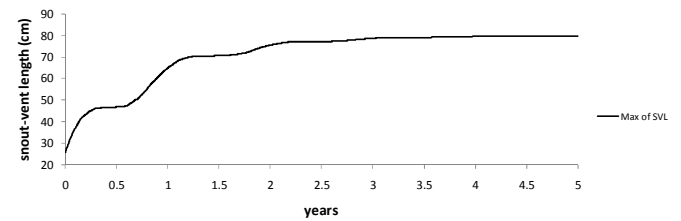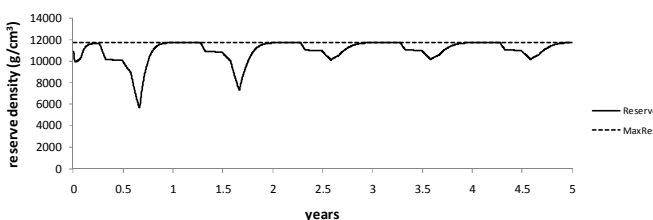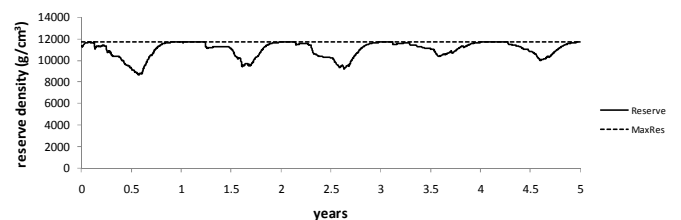

# 1983-1988 Monthly

# Daily

## Thermoregulator (high quality habitat)

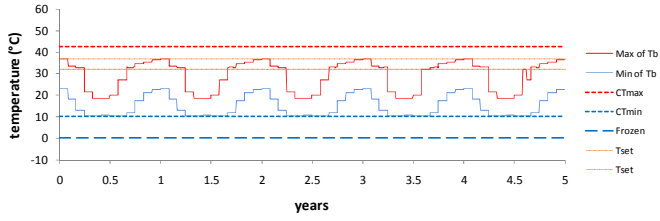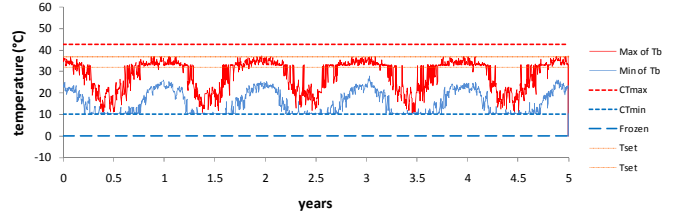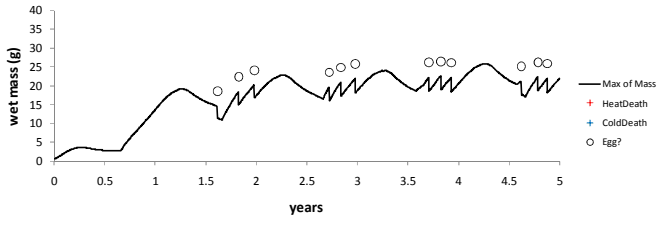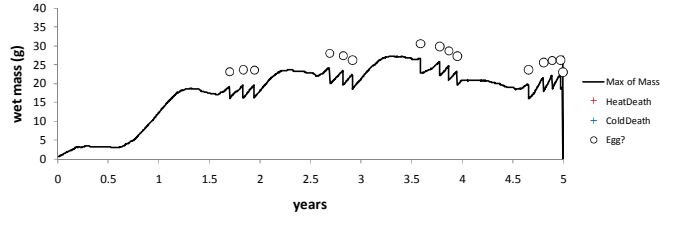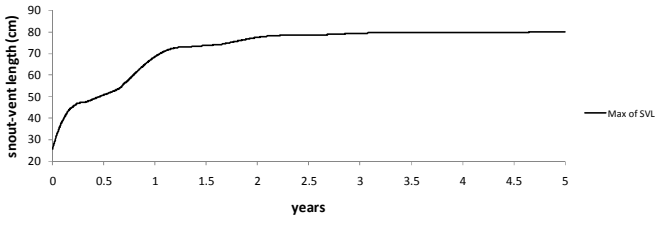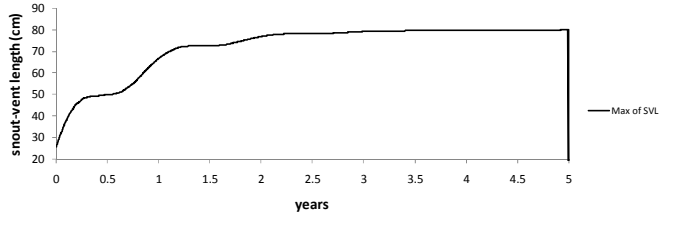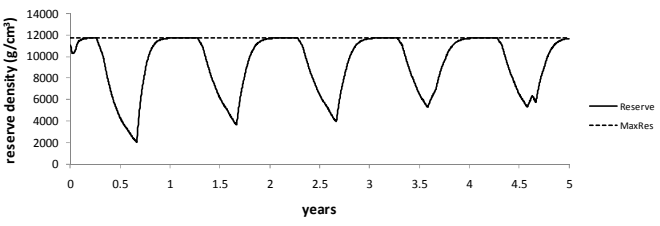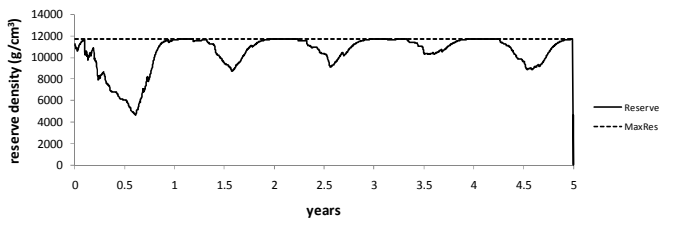

# 1988-1993 Monthly

# Daily

## Thermoconformer (0% shade)

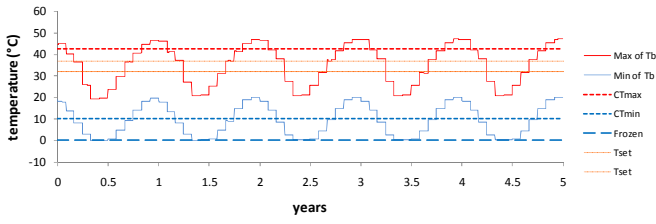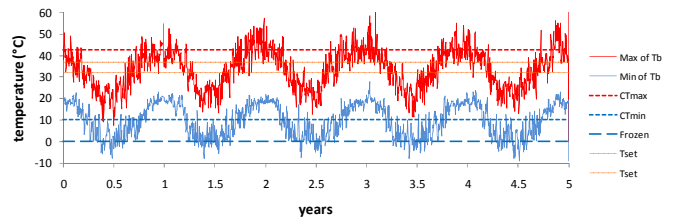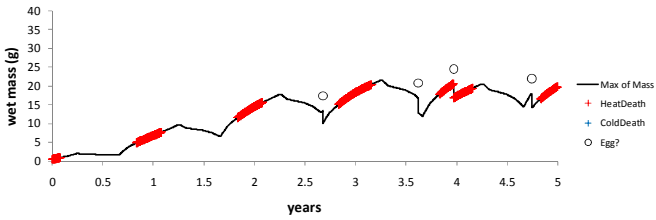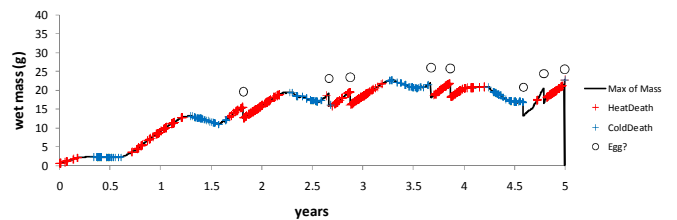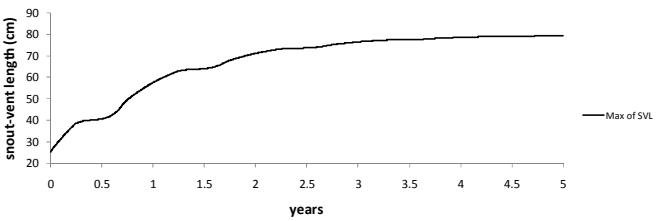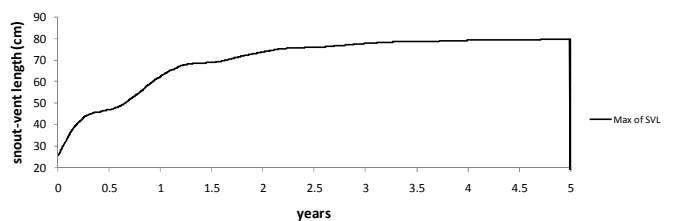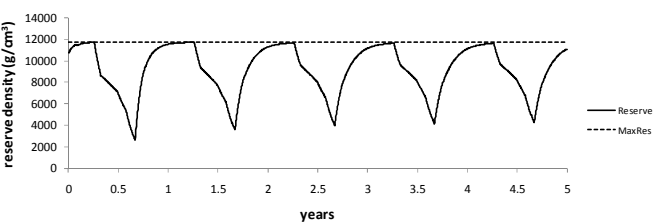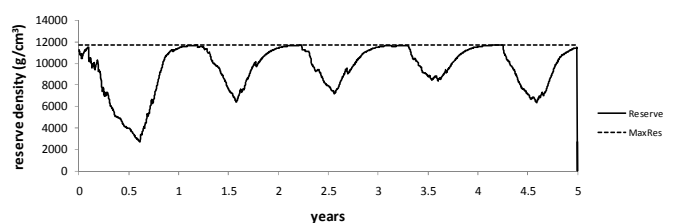

## Thermoregulator (low quality habitat)

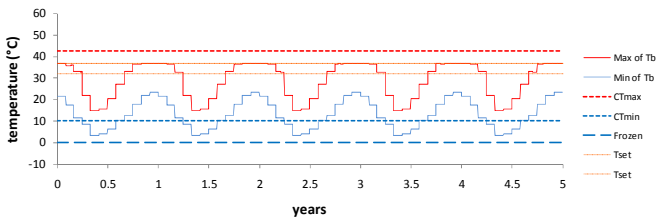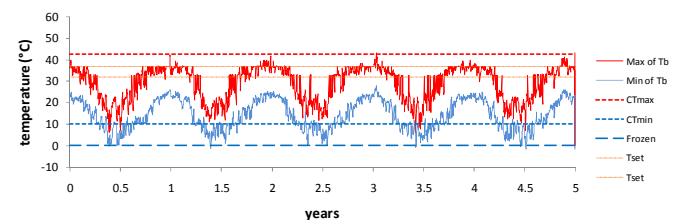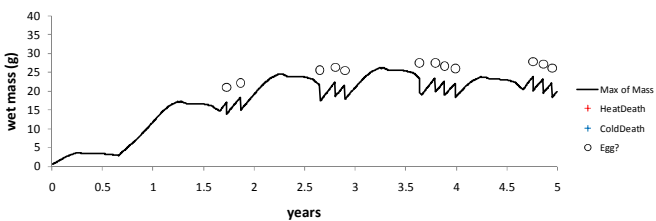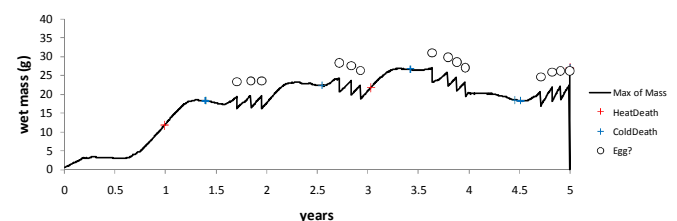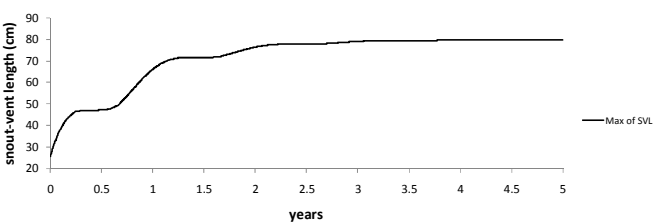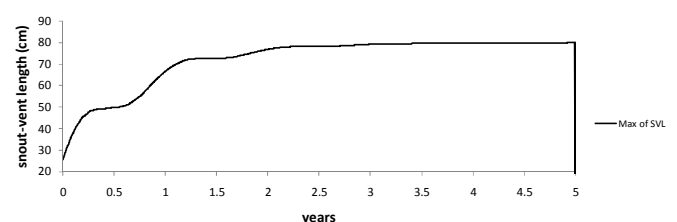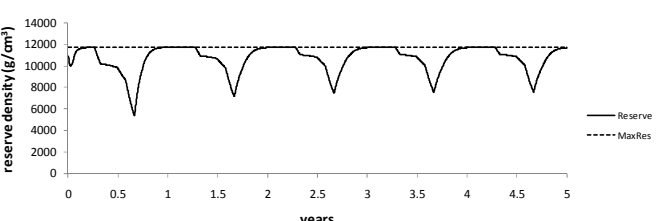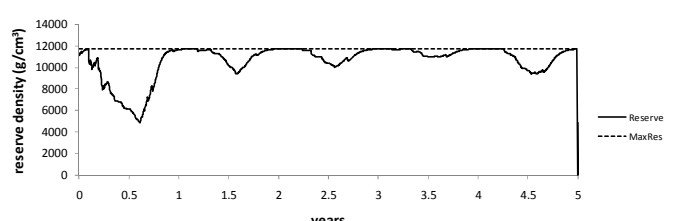

# 1988-1993 Monthly

# Daily

## Thermoregulator (high quality habitat)

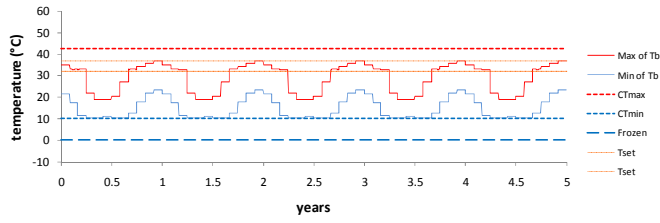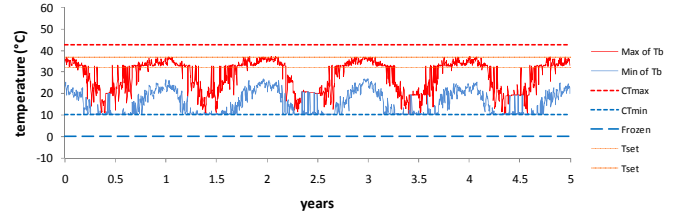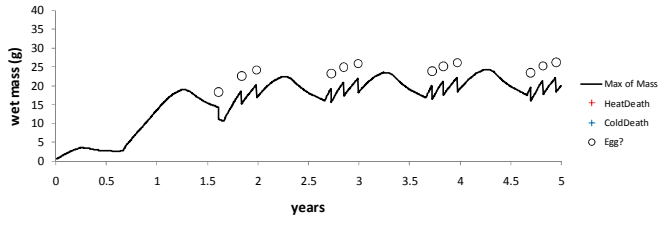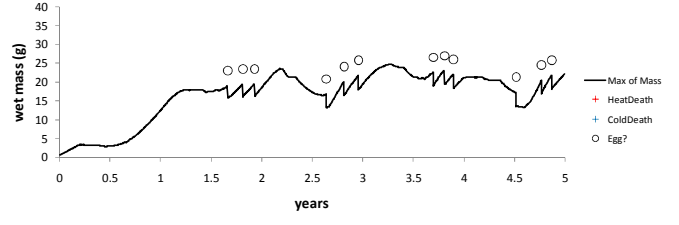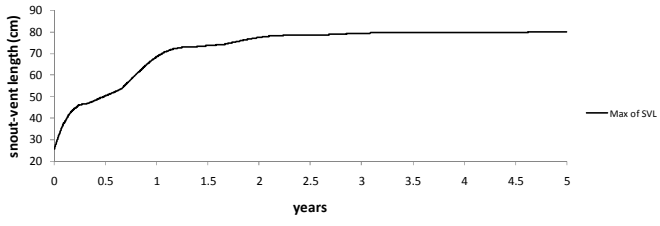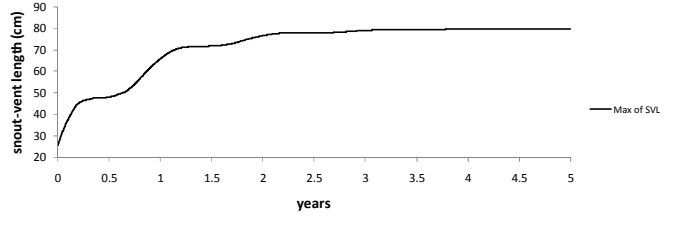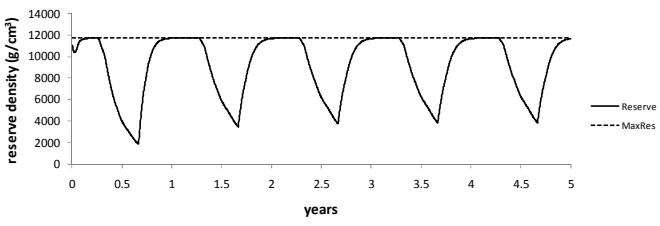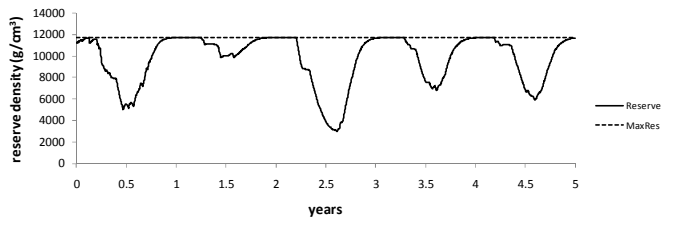



1993-1998 Monthly

Daily

### Thermoconformer (0% shade)

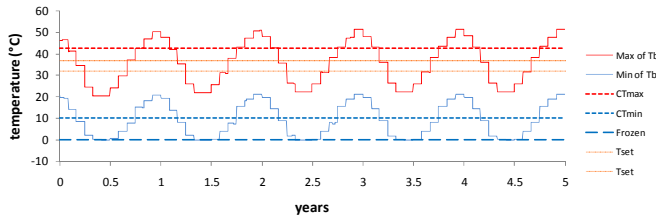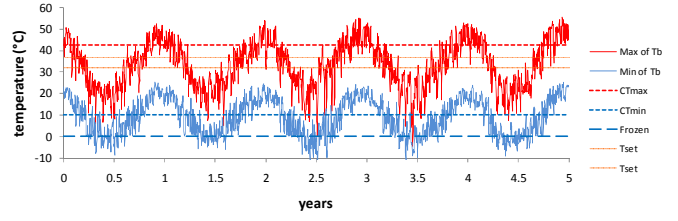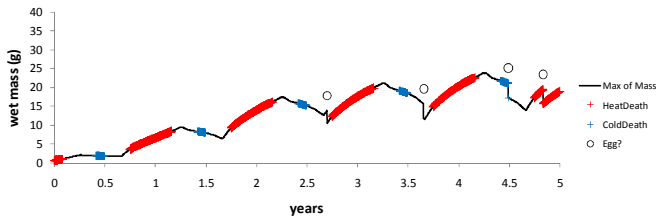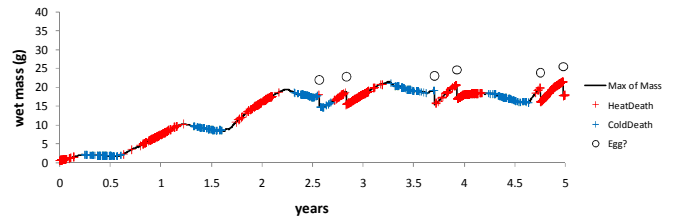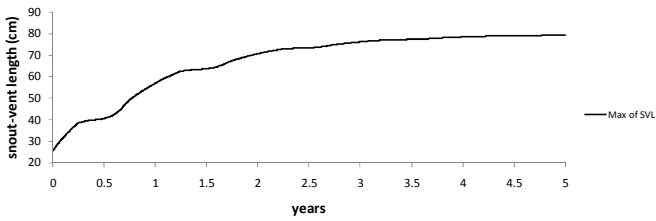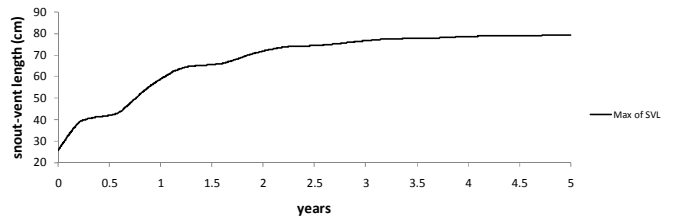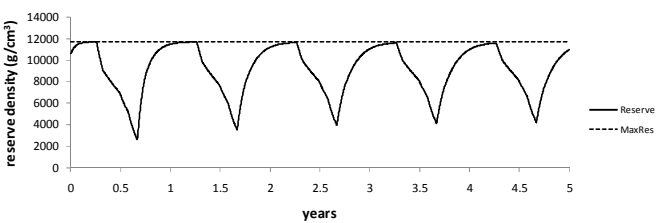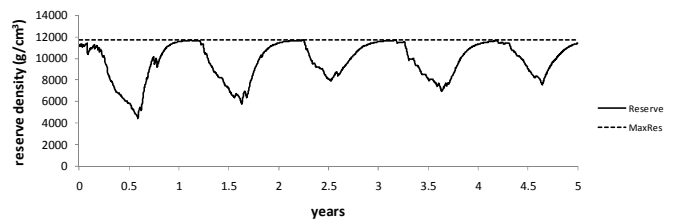

### Thermoregulator (low quality habitat)

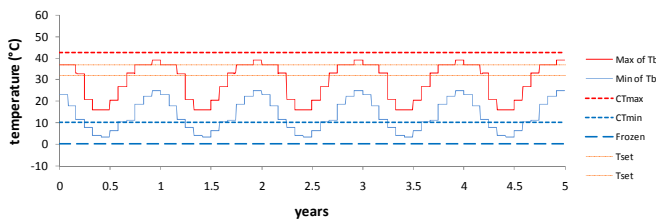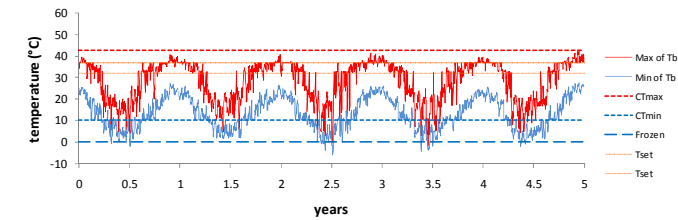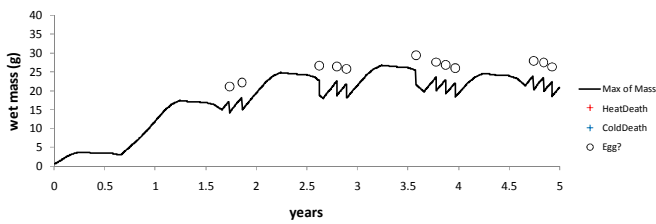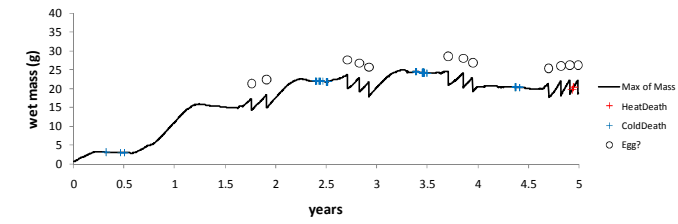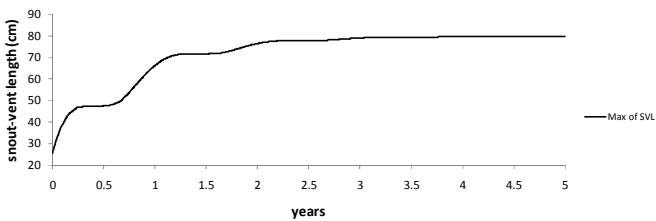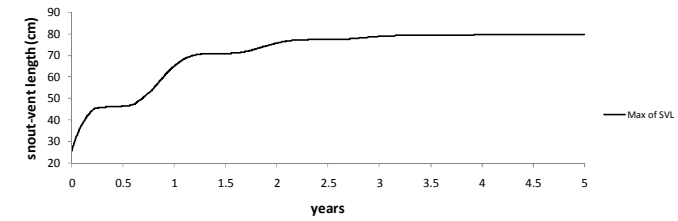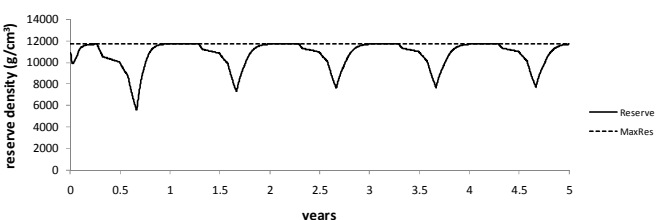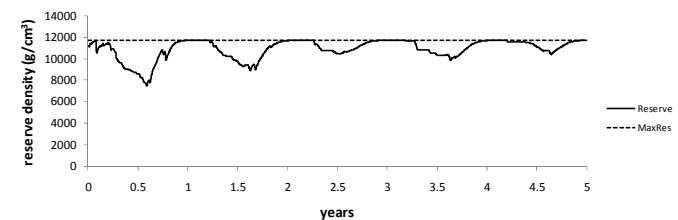

# 1993-1998 Monthly

# Daily

## Thermoregulator (high quality habitat)

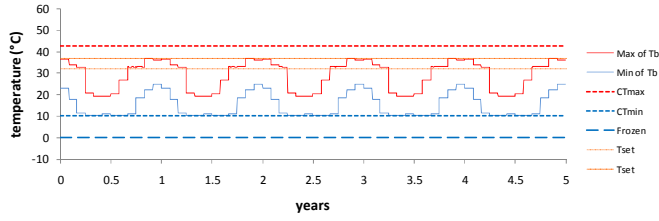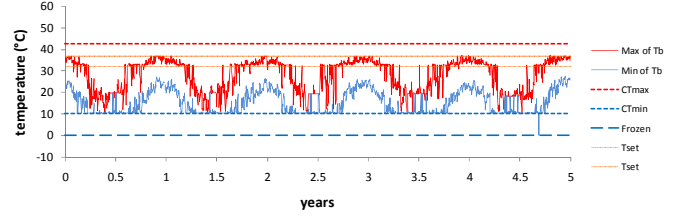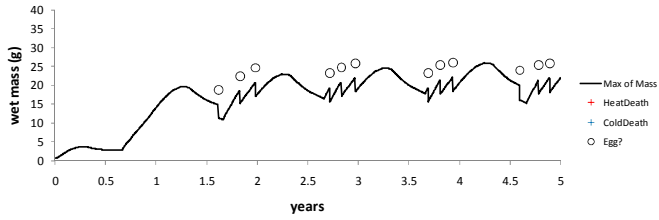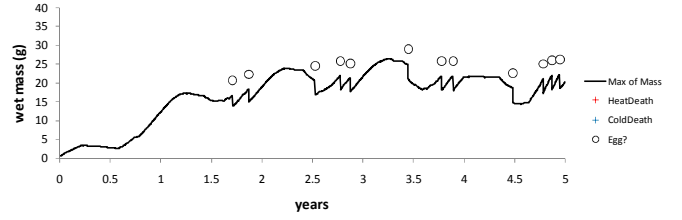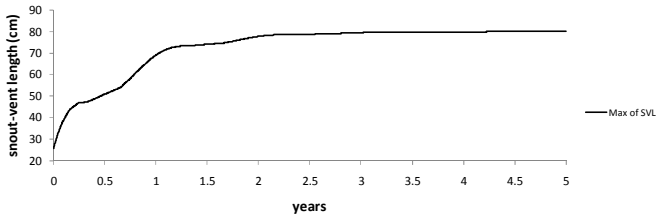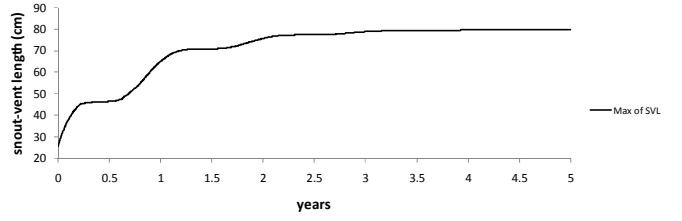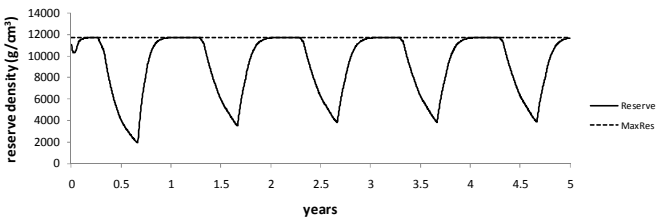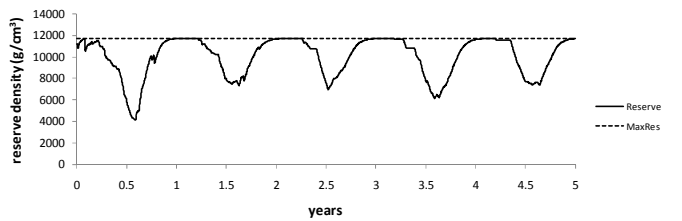

1998-2003 Monthly

Daily

### Thermoconformer (0% shade)

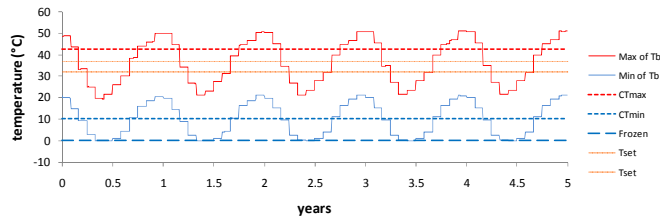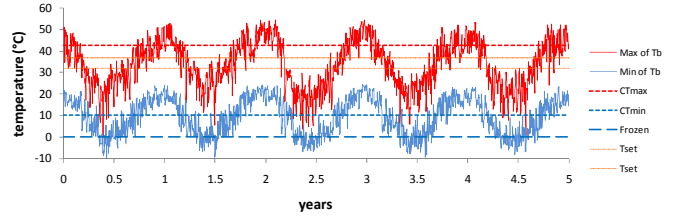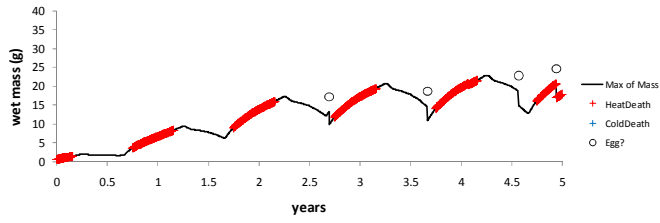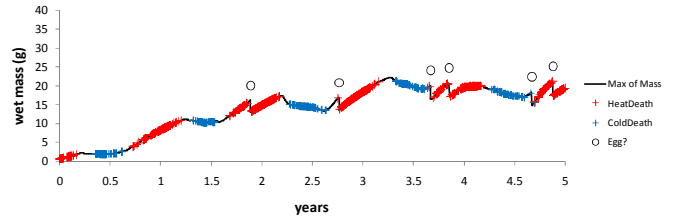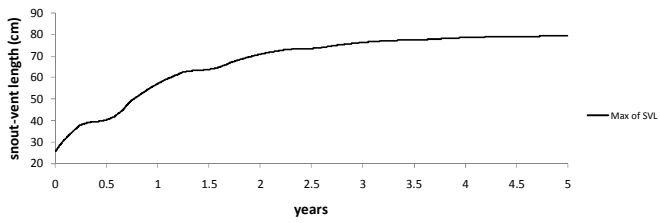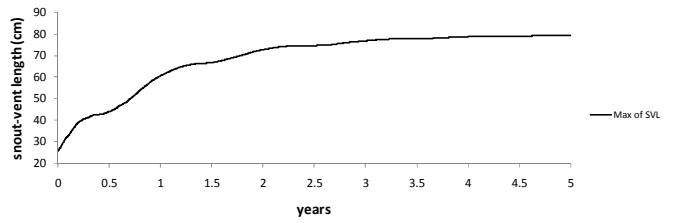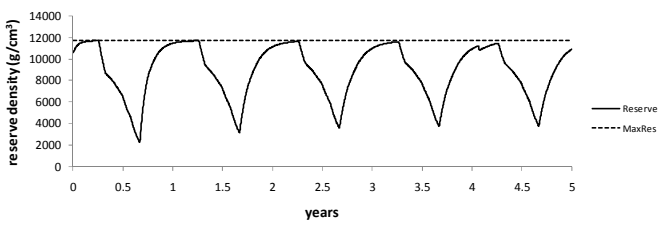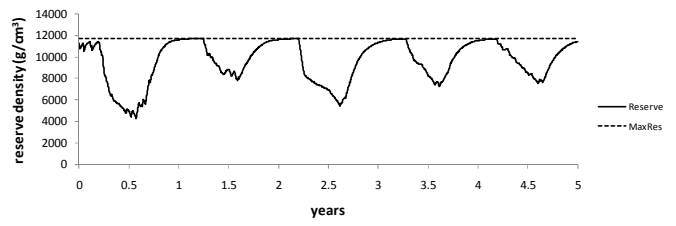

### Thermoregulator (low quality habitat)

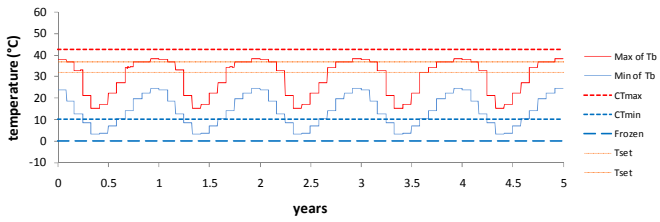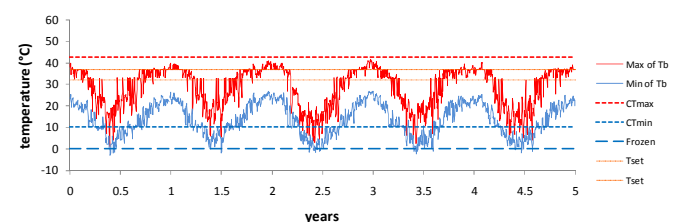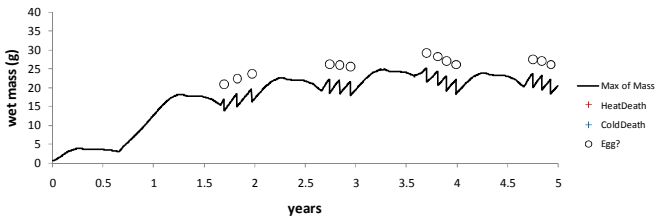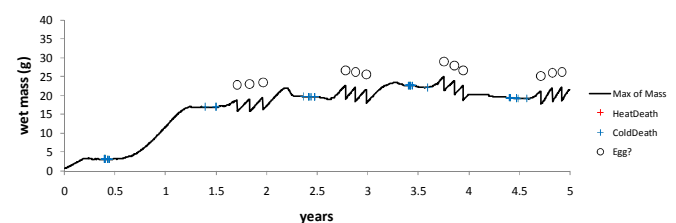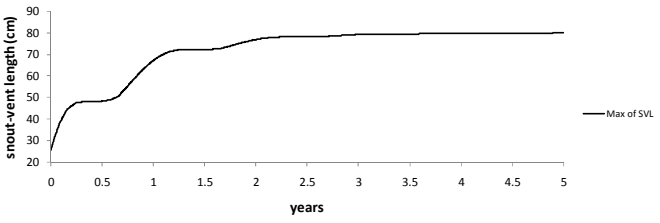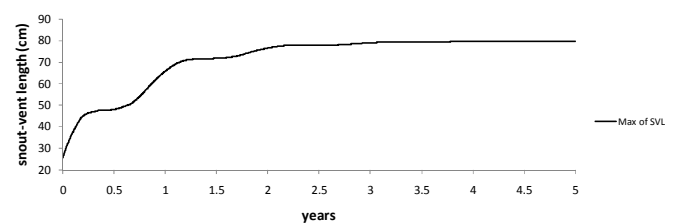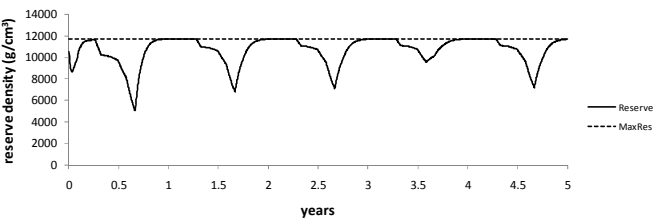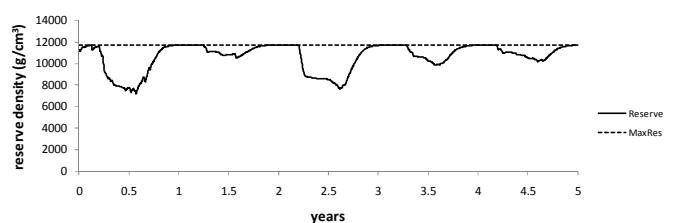

# 1998-2003 Monthly

# Daily

## Thermoregulator (high quality habitat)

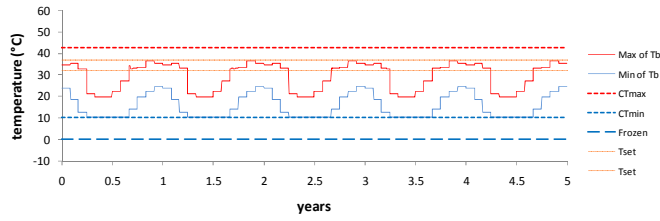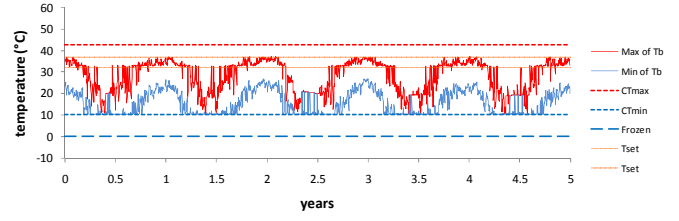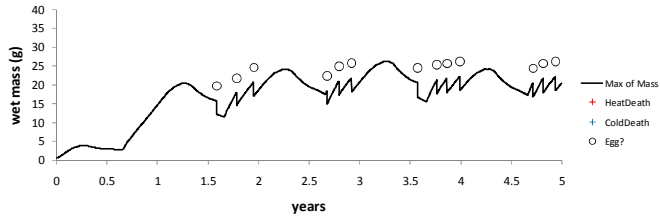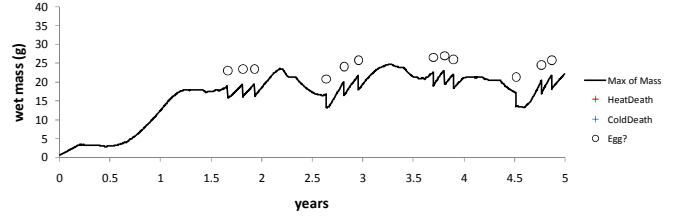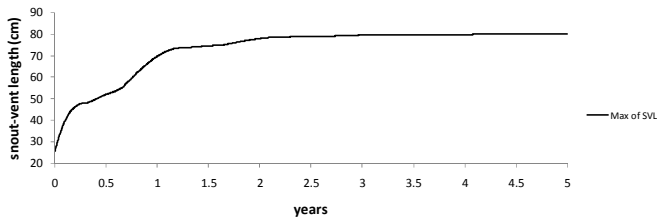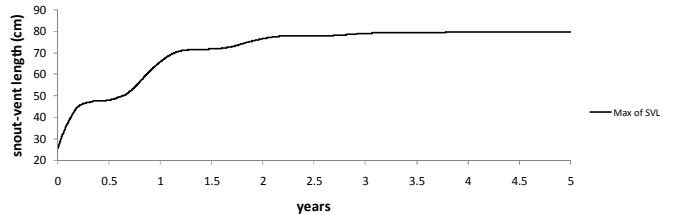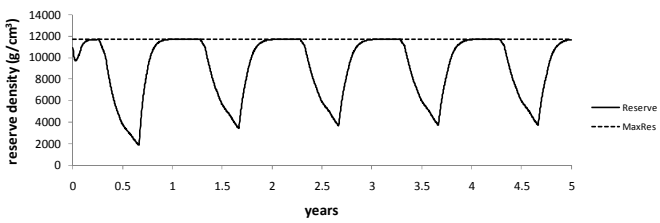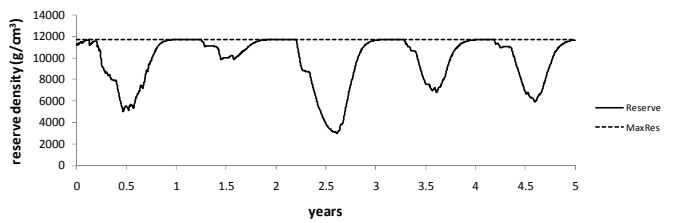

Supplement: jeb059634figs4.pdf [file jeb059634figs4.pdf]
